1      **Maternal vitamin D deficiency increases the risk of obesity in male**  
2                           **mice offspring by affecting the immune response**

3      Pei Li<sup>a1,3</sup>, Ping Li<sup>a2</sup>, Yuanlin Liu, Weijiang Liu<sup>1</sup>, Lanlan Zha<sup>3</sup>, Xiaoyu Chen<sup>2</sup>, Rongxiu  
4      Zheng<sup>3\*</sup>, Kemin Qi<sup>2\*</sup>, Yi zhang<sup>1\*</sup>

5      1. Institute of Radiation Medicine, Academy of Military Medical Sciences, Academy  
6      of Military Sciences, Beijing, 100091, China.

7      2. Laboratory of Nutrition and Development, Beijing Pediatric Research Institute,  
8      Beijing Children's Hospital, Capital Medical University, National Center for  
9      Children's Health, Beijing, 100045, China.

10     3. Department of Pediatrics, General Hospital of Tianjin Medical University, Tianjin  
11     Medical University, Tianjin, 300070, China.

12     **a These authors were contributed equally to this paper.**

13

14     \* **Address correspondence to:**

15     Rongxiu Zheng, M.D., Professor in Pediatrics.

16     Department of Pediatrics, General Hospital of Tianjin Medical University.

17     Address: No. 154 An-shan Road, Heping District, Tianjin, 300070, China.

18     Tel: 8622-60362861, Fax: 8622-60362861, E-mail: rxzheng@hotmail.com.

19     Kemin Qi, M.D., Ph.D., Professor in Pediatric Nutrition.

20     Laboratory of Nutrition and Development, Beijing Pediatric Research Institute,  
21     Beijing Children's Hospital, Capital Medical University.

22     Address: No.56 Nan-li-shi Road, Beijing 100045, China.

23 Tel: 8610-59616895, Fax: 8610-59618700, E-mail: qikemin@bch.com.cn.

24 Yi Zhang, Ph.D., Professor in Basic Medicine.

25 Institute of Radiation Medicine, Academy of Military Medical Sciences, Academy of  
26 Military Sciences.

27 Address: No.27 Tai-ping Road, Beijing, 100091, China.

28 Tel: 8610-66930315, Fax: 8610-66930315, E-mail: zhangyi612@hotmail.com.

29 **Abstract** Recently, many epidemiological and animal studies have indicated  
30 that obesity have their origin in the early stages of life including the inappropriate  
31 balance of some nutrients, the objective of this study is to determine the risk of obesity  
32 in male mice offspring as a consequence of maternal VD deficiency-mediated  
33 disordering of the immune response. Four-week-old C57BL/6J female mice were fed  
34 VD-deficient or normal reproductive diets during pregnancy and lactation. Their male  
35 offspring were weighted and euthanized after being fed control and high-fat diets (HFD)  
36 for 16 weeks starting at the weaning. The serum was collected for biochemical analyses.  
37 Epididymal (eWAT) and inguinal (iWAT) white adipose tissues were excised for  
38 histological examination, immunohistochemistry, gene expressions of inflammatory  
39 factors, and for determining the proportions of immune cells by flow cytometry.  
40 Insufficient maternal VD intake exacerbated the development of obesity both in  
41 non-obese and obese male offspring as evidenced by larger adipose cells and  
42 abnormal glucose and lipid metabolisms. Also, the expression of proinflammatory  
43 cytokine genes was increased and that of anti-inflammatory cytokines was decreased  
44 in maternal VD-deficient groups in the eWAT and/or iWAT. This was accompanied by  
45 higher levels of TNF- $\alpha$  or/and INF- $\gamma$ , and lower levels of IL-4 and IL-10. Insufficient  
46 maternal VD intake was also observed to induce a shift in the profiles of immune cells  
47 in the eWAT and/or iWAT, resulting in increased percentages of M1 macrophage,  
48 ATDCs, and CD4<sup>+</sup> and CD8<sup>+</sup> T cells, but caused a significant decrease in the  
49 percentage of M2 macrophages, both in non-obese and obese male offspring. All these

50 changes in the immune cell profile were more obvious in the eWAT than in the iWAT.  
51 These results indicated that insufficient maternal VD intake promoted the development  
52 of obesity in male offspring by modulating the immune cell populations and causing a  
53 polarization in the adipose depots.

54 **Importance** Evidence in this study has indicated that insufficient maternal VD  
55 intake promotes the development of obesity in the male offspring by modulating the  
56 recruitment of immune cell populations and their polarization as well as the  
57 expression and secretion of proinflammatory adipokines in the adipose depots in a  
58 weight-independent manner, which is more obvious in eWAT than that in the iWAT.

59 **Key words:** Vitamin D; obesity; macrophage; dendritic cells; adipose tissue

## 60 **Introduction**

61 The prevalence of overweight and obesity has reached epidemic proportions  
62 throughout the world, and is associated with increased morbidity and mortality,  
63 contributing to the burden of chronic diseases (1-3). However, the mechanisms  
64 underlying obesity remain unclear. There is, therefore, an urgent need for effective  
65 intervention strategies. During the past decade, the state of chronic low-grade systemic  
66 inflammation caused by inflation of adipose tissue macrophages (ATMs), followed by  
67 increased production of pro-inflammatory cytokines, such as TNF- $\alpha$ , IL-6, and  
68 decreased contents of anti-inflammatory factors, including IL-10, has been recognized  
69 as one of the factors in the pathogenesis of obesity (4-6). It is well established that the  
70 crosstalk between adipocyte hypertrophy and inflammation can exacerbate chronic  
71 inflammation (7,8). Macrophages (M) make up the majority of leukocytes infiltrating  
72 the adipose tissue (9). The infiltration of M1, the pro-inflammatory ATMs, represents  
73 a key event influencing the adipose tissue dysfunction. With increasing adiposity, the  
74 polarization status of anti-inflammatory M2 macrophages switches to a more  
75 pro-inflammatory M1 state so that these macrophages jointly promote the  
76 development of obesity<sup>10</sup>. Obesity is associated with adipocyte hypertrophy, which

77 can cause rupturing of adipocytes and result in increased local accumulation of  
78 inflammatory cells, including M1 and M2 macrophages and Th1/Th2 cells, as well as  
79 in the altered production of adipokines (11). The increase in the numbers of M1 can  
80 elicit effector functions through a surplus production of pro-inflammatory cytokines  
81 and promotes insulin resistance in adipocytes (12). The decreased secretion of  
82 inflammatory adipokines from obese adipose tissue can decrease the ongoing  
83 recruitment and polarization of macrophages to exacerbate chronic inflammation in  
84 obesity (13,14).

85 Vitamin D (VD) comprises an important group of fat-soluble seco-sterols  
86 required for bone growth and calcium homeostasis, as well as for its role as an  
87 enzyme agonist. There is a strong association between VD status and obesity, with  
88 low VD levels being highly prevalent in obese people (15,16). Achieving dietary  
89 reference intake through VD supplements could reduce body weight by influencing  
90 calcium absorption (17), parathyroid hormone expression (18), phosphate metabolism  
91 (19), growth-plate function (20), and regulation of inflammatory reactions (21). *In*  
92 *vitro* experiments have confirmed that VD has immunoregulatory effects and can  
93 reduce adipocyte inflammation, which may participate in the reduction of adipose  
94 tissue macrophage infiltration in the context of obesity-associated low-grade  
95 inflammation (22). Besides, animal experiments have also shown that dietary  
96 insufficiency of VD exacerbates high-fat diet-induced gain in body weight,  
97 adipose tissue expansion and macrophage infiltration, and inflammation  
98 (23). However, the specific mechanisms for such effects remain unclear.

99 Recently, many epidemiological and animal studies have indicated that  
100 overweight and obesity have their origin in the early stages of life; for example, an  
101 inappropriate balance of some nutrients during the early infancy or fetal life, can  
102 permanently alter the properties of fatness (24). Under these conditions, timely and  
103 accurate nutritional intervention during the perinatal period is likely to be more  
104 effective than the interventions for improvement of metabolic health in the later part of

105 life (25). Vitamin D deficiency is prevalent among all age groups, and especially in  
106 pregnant women who require higher amounts of VD for their own metabolism as well  
107 as for their baby (26). In an epidemiological research, low VD status was found in  
108 about 69% of the pregnant women in China (27). Despite the known effects of  
109 maternal VD deficiency on the obesity of the offspring, clinical and animal studies  
110 designed to evaluate the effect on body fat mass in the offspring have produced mixed  
111 results owing to several methodological limitations (28-31). Moreover, only a few  
112 studies have reported on the possible mechanisms underlying the effects of maternal  
113 VD deficiency on the body weight of the offspring expect for its effects on adipocyte  
114 proliferation (30). Therefore, in the present study, we investigated the effects of  
115 insufficient VD intake through diet during maternal pregnancy and lactation on the  
116 body weight gain in the male offspring and on the immune response using a high-fat  
117 diet-induced obese mouse model.

## 118 **Results**

119 **Maternal and offspring VD status.** The concentrations of 25(OH)D<sub>3</sub> were  
120 assessed in five mice from each group of mother and 21-day-old male offspring  
121 (Supplement Figure 2) to confirm that the contents of vitamin D *in vivo* were  
122 consistent with the dietary regimen [Mother: 134.14 µg/L (VD-C), 43.87 µg/L  
123 (VD-D); 21-day-old male offspring: 251.66 µg/L (VD-C), 167.78 µg/L (VD-D)]. As  
124 shown in Table 1, no differences existed in the levels of 25(OH)D<sub>3</sub> in either  
125 non-obese (VD-C and VD-D) or obese (VD-C-HFD and VD-D-HFD) male offspring  
126 born to females in the maternal VD-sufficient or -deficient groups. However, the  
127 levels were lower in all the obese groups than that in the non-obese groups ( $P < 0.05$ ).

128 **Body and adipose tissue weight.** As shown in Table 1 and Figure 1, there were  
129 maternal effects of VD intake on the body and adipose tissue weight, both in the  
130 non-obese and obese male offspring. The body, eWAT, and iWAT weights and the  
131 percentages of eWAT and iWAT were prominently higher in mice from dams of the  
132 VD-D group, than in those from the VD-C group; the former also had larger adipose

133 cells in the eWAT (Figure 1C and 1D) and iWAT (Figure 1E and 1F) ( $P<0.05$ ). In  
134 contrast, among the obese offspring, the body, eWAT, and iWAT weights, and the  
135 percentages of eWAT were higher and the volume of fat cells in eWAT was larger in  
136 the VD-D-HFD group than in the VD-C-HFD group ( $P<0.05$ ).

137 **Glucose and lipid metabolism-related indicators in the serum.** The baseline  
138 fasting glucose concentrations were not affected by the different maternal VD intake  
139 during pregnancy and lactation both in non-obese and obese male offspring, whereas  
140 higher glucose levels were observed in the serum in the obese groups (VD-C-HFD  
141 and VD-D-HFD) than in the non-obese groups (VD-C and VD-D) ( $P<0.05$ ) (Table 1).  
142 Likewise, the circulating glucose response to the glucose load, as indicated by OGTT,  
143 ITT, and related by the area under the curve (AUC) (Figure 1G 1H, 1I and 1J),  
144 showed that the glucose levels in the maternal VD-deficient group increased both in  
145 the non-obese (VD-D vs. VD-C) and obese (VD-D-HFD vs. VD-C-HFD) male  
146 offspring after intraperitoneal glucose administration ( $P<0.05$ ). However, the results  
147 of ITT showed that the offspring from maternal VD-sufficient mice did not show  
148 improved insulin tolerance. Besides, the results of immunohistochemistry showed that  
149 the number of insulin-positive cells and insulin secretion decreased significantly in  
150 the maternal VD-deficient group both in the non-obese (VD-D vs. VD-C) and obese  
151 (VD-D-HFD vs. VD-C-HFD) male offspring ( $P<0.05$ ).

152 The concentrations of lipid metabolism-related indicators, namely TG and TC,  
153 are presented in Table 1. The concentrations of TG and TC in the obese (VD-D-HFD  
154 and VD-C-HFD) groups were higher than those in the non-obese (VD-D and VD-C)  
155 groups. Furthermore, comparison between the two similar groups showed that the  
156 contents of TG increased in the VD-D group compared to that in the VD-C group,  
157 whereas among the obese groups, the concentrations of TG and TC were higher in the  
158 VD-D-HFD group than in the VD-C-HFD group ( $P<0.05$ ).

159 **Infiltration and percentage of immune cells in the eWAT and iWAT.** The  
160 infiltration of inflammatory factors in eWAT and iWAT, shown by F4/80 in Figure 2C

161 and D, was more prominent in the obese (VD-D-HFD vs. VD-D and VD-C-HFD vs.  
162 VD-C) groups, whereas more inflammatory factors were present in the eWAT in  
163 maternal VD-deficient group both in the non-obese (VD-D vs. VD-C) and obese  
164 (VD-D-HFD vs. VD-C-HFD) male offspring. However, in the iWAT, these factors  
165 were consistently found in the non-obese male offspring (VD-D vs. VD-C).

166 The percentages of immune cells, including CD11C<sup>+</sup> ATMs, CD11C<sup>-</sup> ATMs,  
167 ATDCs, CD4<sup>+</sup> T cells, and CD8<sup>+</sup> T cells, in the eWAT and iWAT are presented in  
168 Figure 2A and 2B. In the eWAT, the percentages of CD11C<sup>+</sup> ATMs, ATDCs, and  
169 CD4<sup>+</sup>T cells were higher, and that of CD11C<sup>-</sup> ATMs were lower in the obese  
170 (VD-D-HFD and VD-C-HFD) groups than in the non-obese groups (VD-D and VD-C)  
171 ( $P<0.05$ ). Further comparison between the two similar groups showed that maternal  
172 VD deficiency during pregnancy and lactation could increase the percentages of  
173 CD11C<sup>+</sup> ATMs, ATDCs, and CD4<sup>+</sup> T cells and decrease the percentages of CD11C<sup>-</sup>  
174 ATMs and CD8<sup>+</sup> T cells both in the non-obese (VD-D vs. VD-C) and obese  
175 (VD-D-HFD vs. VD-C-HFD) male offspring ( $P<0.05$ ). However, in the iWAT, the  
176 percentages of CD11C<sup>+</sup> ATMs, CD11C<sup>-</sup> ATMs, and ATDCs were higher, and that of  
177 CD8<sup>+</sup> T cells was lower in the obese (VD-D-HFD and VD-C-HFD) groups than in the  
178 non-obese (VD-D and VD-C) groups ( $P<0.05$ ). Further comparison among the two  
179 similar groups showed that maternal VD deficiency during pregnancy and lactation  
180 could increase the percentages of CD11C<sup>+</sup> ATMs and decrease the contents of CD8<sup>+</sup> T  
181 cells both in the non-obese (VD-D vs. VD-C) and obese (VD-D-HFD vs. VD-C-HFD)  
182 male offspring ( $P<0.05$ ).

183 **Population of ATM, ADTC, and T cells in the eWAT and iWAT.** Within the  
184 adipose tissues, CD45<sup>+</sup>CD64<sup>+</sup> cells in the SVFs were identified as the ATMs, which  
185 were then further characterized as CD11C<sup>+</sup> ATMs (M1 ATMs, M1 macrophages) and  
186 CD11C<sup>-</sup> ATMs (M2 ATMs, M2 macrophages). The adipose tissue dendritic cells  
187 (ATDCs) were identified as CD45<sup>+</sup>CD64<sup>-</sup>CD11C<sup>+</sup>. The T cells were identified as  
188 CD45<sup>+</sup>CD3<sup>+</sup>, and were further categorized as CD4<sup>+</sup> and CD8<sup>+</sup> T cells.

189 In the eWAT (see Figure 3), M1 ATMs, M1 ratio (M1/M2), ATDCs, CD4<sup>+</sup>, and  
190 CD8<sup>+</sup> T cells increased, and M2 ATMs and M2 ratio (M2/M1) decreased with the  
191 feeding of HFD (VD-C-HFD vs. VD-C and VD-D-HFD vs. VD-D) ( $P<0.05$ ), with no  
192 changes in the ratio of CD4<sup>+</sup>/CD8<sup>+</sup> T cells. Maternal VD deficiency during pregnancy  
193 and lactation led to significant increases in M1 ATMs, M1 ratio (M1/M2), and ATDCs,  
194 and reduced the M2/M1 ratio both in the non-obese (VD-D vs. VD-C) and obese  
195 (VD-D-HFD vs. VD-C-HFD) groups ( $P<0.05$ ). Besides, maternal VD deficiency  
196 caused a weight-independent increase in CD4<sup>+</sup> T cells in the non-obese (VD-D vs.  
197 VD-C) groups ( $P<0.05$ ). In the iWAT, the M1 ATMs, M2 ATMs, ATDCs, CD4<sup>+</sup> T  
198 cells, M1/M2 ratio, and CD4<sup>+</sup>/CD8<sup>+</sup> T cells increased, and CD8<sup>+</sup>/CD4<sup>+</sup> T cells  
199 decreased with HFD feeding ( $P<0.05$ ), but there was no effect on the proportion of  
200 CD8<sup>+</sup>/CD4<sup>+</sup> T cells (Figure 4). In contrast, there was a significant weight-independent  
201 upregulation in the proportion of ATDCs both in the non-obese (VD-D vs. VD-C) and  
202 obese (VD-D-HFD vs. VD-C-HFD) groups ( $P<0.05$ ). Within the control groups, it  
203 was observed that M1 ATMs, M2 ATMs, CD4<sup>+</sup> T cells, CD8<sup>+</sup> T cells, and M1/M2  
204 ratio were higher in the VD-D group than in the VD-C group ( $P<0.05$ ), which were  
205 not matched by all types of immune cells, only leaving higher percentage of CD4<sup>+</sup> T  
206 cells (CD4<sup>+</sup>/CD8<sup>+</sup>) and lower percentage of CD8<sup>+</sup> T cells (CD8<sup>+</sup>/CD4<sup>+</sup>) in the  
207 VD-D-HFD group than those in the VD-C-HFD group ( $P<0.05$ ).

208 **Gene expression profiles of proinflammatory and inflammasome cytokines**  
209 **in the eWAT and iWAT.** To examine the effects of different maternal vitamin D  
210 intake during pregnancy and lactation on the expression of proinflammatory (INOS,  
211 IL-1 $\beta$ , TNF- $\alpha$ , INF- $\gamma$ , and IL-6) and anti-inflammatory (Arg-1, IL-4, and IL-10)  
212 cytokine genes in the eWAT and iWAT, we analyzed the mRNA levels of these genes.  
213 Compared with the VD-C group, the expression levels of all the proinflammatory and  
214 anti-inflammatory cytokines were significantly increased both in the eWAT and iWAT  
215 of VD-D, VD-C-HFD, and VD-D-HFD mice, whereas the expression of Arg-1 was  
216 apparently reduced (Figure 5,  $P<0.05$ ). Moreover, in the obese mice, the mRNA levels  
217 of INOS, IL-1 $\beta$ , TNF- $\alpha$ , INF- $\gamma$ , and IL-6 were higher and those of Arg-1, IL-4, and



218 IL-10 were lower in the VD-D-HFD group than in the VD-C-HFD group in the eWAT  
219 ( $P<0.05$ ). Consistently, the levels of INF- $\gamma$  were significantly increased, whereas  
220 those of Arg-1 were decreased in the iWAT of VD-D-HFD mice compared to the  
221 respective levels in the VD-C-HFD mice ( $P<0.05$ ). However, the effects on the other  
222 cytokines in the iWAT were not significantly different. Taken together, these results  
223 indicate that maternal VD status could affect the expression of some proinflammatory  
224 and inflammasome cytokine genes in the eWAT and iWAT, and that the differences  
225 were greater in the eWAT.

226 **Levels of cytokines in the serum.** The levels of serum cytokines, TNF- $\alpha$ , INF- $\gamma$ ,  
227 IL-6, IL-4, and IL-10, were determined in all the samples (Figure 6). High-fat diets  
228 resulted in a significant increase in the levels of TNF- $\alpha$  and INF- $\gamma$  and a significant  
229 decrease in the levels of IL-4 and IL-10. Furthermore, the levels of TNF- $\alpha$  or/and  
230 INF- $\gamma$  were higher, whereas those of IL-4 and IL-10 were lower in the maternal  
231 VD-deficient group both in the non-obese (VD-D vs. VD-C) and obese (VD-D-HFD  
232 vs. VD-C-HFD) male offspring.

## 233 **Discussion**

234 Recently, several epidemiological and experimental studies have indicated that  
235 VD supplementation is effective in reducing body weight, body-mass index, and fat  
236 mass and is associated with decreased levels of low-density lipoprotein cholesterol  
237 (32,33). In this study, we investigated whether the effects of maternal VD status  
238 during pregnancy and lactation had a long lasting adverse effect on the progress of  
239 obesity in the male offspring. We found that insufficient maternal VD intake could  
240 worsen the development of obesity both in the non-obese (VD-D vs. VD-C) and obese  
241 (VD-D-HFD vs. VD-C-HFD) male offspring, as evidenced by larger adipose cells,  
242 and abnormal glucose and lipid metabolisms in the eWAT and/or iWAT. All these  
243 results were consistent with those reported by Belenchia et al (34). All these results  
244 suggest that gestation of male murine offspring in an environment of maternal VD  
245 deficiency can lead to fetal growth restrictions, accelerated growth in early life, larger

246 visceral body fat pads, and greater susceptibility to HFD-induced adipocyte  
247 hypertrophy. Besides, all these changes were more obvious in the eWAT than in the  
248 iWAT because obesity is mainly caused by the increase in white fat and inflammatory  
249 infiltration, and it is more complex of the cells types in eWAT to weaken the  
250 difference above.

251       The reasons for the observed harmful effects of insufficient maternal VD intake  
252 on the weight gain include an unhealthy trabecular bone structure (31), unreasonable  
253 colonization of intestinal flora (30), greater susceptibility to HFD-induced adipocyte  
254 hypertrophy among others (35). Adipocyte hypertrophy could lead to the alterations in  
255 immune cell populations after the onset of obesity. It is well established that the  
256 development of obesity is characterized by immune cell infiltration and low-grade  
257 inflammation in the obese adipose tissue. Macrophages make up the majority of the  
258 leukocytes infiltrating the adipose tissue, and two primary types of macrophages  
259 (ATMs) have been identified based on the expression of CD11C (36). Lean mice and  
260 humans have a preponderance of the resident population of CD11C<sup>-</sup> ATMs (M2)  
261 whereas obese individuals accumulate CD11C<sup>+</sup> ATMs (M1) that have a lysosomal  
262 activation phenotype (37,38). In this case, cytokines that are released by inflammatory  
263 cells infiltrating the obese adipose tissue include tumor necrosis factor-alpha (TNF- $\alpha$ ),  
264 Interferon gamma (INF- $\gamma$ ), interleukin 6 (IL-6), monocyte chemoattractant protein 1  
265 (MCP-1), and IL-1. All these molecules may act on immune cells leading to local and  
266 generalized inflammation. As expected, Elimrani et al. showed that VD  
267 supplementation reduced the severity of colitis and decreased the number of  
268 inflammation-associated colorectal tumors in C57BL/6J and diabetic mice (39).  
269 Martinez-Santibanez et al also showed that HFD-induced male obesity was associated  
270 with more weight gain and increased accumulation of CD11c<sup>+</sup> ATMs, which are  
271 known to be involved in adipose tissue remodeling, in the animals in the VD-deficient  
272 group than in control group animals (40). This study indicated that appropriate intake  
273 of VD might regulate the ratio between these two types of ATMs to improve their  
274 function, helping the adipose tissue to remodel, which can contribute to adipocyte

275 hypertrophy. We also found increased expression of proinflammatory and decreased  
276 expression of anti-inflammatory cytokines in maternal VD-deficient groups  
277 (VD-D-HFD vs. VD-C-HFD and VD-D vs. VD-C) in the eWAT and/or iWAT,  
278 accompanied by higher levels of TNF- $\alpha$  or/and INF- $\gamma$ , and lower contents of IL-4 and  
279 IL-10. We also observed that insufficient maternal VD intake induced a shift in the  
280 immune cell profiles in the eWAT and/or iWAT, which included increased percentages  
281 of M1 macrophages both in non-obese and obese male offspring. In addition,  
282 macrophage infiltration in the adipose tissue, as demonstrated by number of CLS  
283 (F4/80-positive adipocytes surrounded by macrophages), was exacerbated by  
284 inadequate VD intake. All these immune changes were more obvious in the eWAT  
285 than in the iWAT. These results indicated that VD insufficiency-increased adipose  
286 tissue inflammation might be a consequence of diet-induced adipose expansion/  
287 obesity together with increased inflammation in the white adipose tissue.

288 In obesity, the accumulation of CD4<sup>+</sup> T cells and CD4<sup>+</sup>/CD8<sup>+</sup> cells precedes  
289 macrophage infiltration to promote their recruitment to the obese adipose tissue. The  
290 increased proportion of ATDCs can also contribute to altered immune function in the  
291 adipose tissue that might aggravate the metabolic function including obesity. Recent  
292 investigations have emphasized the contributions of adaptive immune cells, especially  
293 CD4<sup>+</sup> and CD8<sup>+</sup> T cells that play an important role in immunity by regulating the  
294 secretion of proinflammatory cytokines, such as IFN- $\gamma$  and TNF- $\alpha$ , to affect the  
295 progression of obesity and associated disorders (41). Moreover, the accumulation of  
296 these cells induces inflammation (42). This is further characterized by an increase in  
297 IFN- $\gamma$  producing CD8<sup>+</sup> T cells in the lamina propria of obese versus lean subjects,  
298 suggesting a proinflammatory shift of CD8<sup>+</sup> T cells in the intestine of individuals with  
299 obesity. This proinflammatory shift, with an increased number of CD4<sup>+</sup> and CD8<sup>+</sup> T  
300 cells was also confirmed in another study on the colon and small intestine of persons  
301 with obesity, albeit in a smaller population(43). Additionally, we found that the  
302 proportions of CD4<sup>+</sup> and CD8<sup>+</sup> T cells were increased in the obese male offspring, and  
303 were also higher in the eWAT and/or iWAT of maternal VD-deficient groups (VD-D

304 vs. VD-C), accompanied by higher levels of TNF- $\alpha$  or/and INF- $\gamma$ . Classically, it is  
305 possible that the increased ratio of ATDCs can contribute to altered immune function  
306 in the adipose tissue that may contribute to its expansion. Zlotnikov-Klionzky et al  
307 reported that deletion of perforin positive ATDCs had a high impact on metabolic  
308 phenotype as mice lacking perforin-positive ATDCs gained weight while being  
309 maintained on a control diet, were glucose intolerant and insulin resistant, and had  
310 increased levels of lipids in the blood (44). Our observations suggest that ATDCs have  
311 the capacity to control T cell fates as antigen presenting cells and maternal VD  
312 deficiency could increase the percentages of ATDCs both in non-obese (VD-D vs.  
313 VD-C) and obese (VD-D-HFD vs. VD-C-HFD) male offspring.

314 In the summary, we found that insufficient maternal VD intake promotes the  
315 development of obesity in the male offspring by modulating the recruitment of immune  
316 cell populations and their polarization as well as the expression and secretion of  
317 proinflammatory adipokines in the adipose depots in a weight-independent manner.

## 318 **Materials and Methods**

319 **Animal study.** Thirty-four-weeks-old C57BL/6J female mice purchased from  
320 Charles River SPF Laboratory Animal Technology Co. Ltd. (Beijing) were housed in  
321 the laboratory Animal Center of the Institute of Military Medicine, Military Academy  
322 of Military Sciences of China under standard conditions with 12-h light/12-h dark  
323 cycle at 22°C and 50% relative humidity. The female mice were randomly divided  
324 into two groups (n=15/group) according to their initial body weight. They received  
325 the modified gestating and growing formula (D10012G), containing 5000 (VD-C,  
326 Control group) or 25 (VD-D, VD deficient group) IU vitamin D<sub>3</sub>/kg diet for 6 week  
327 to obtain an optimal (>50nM) or deficient (<30nM) vitamin D status, respectively, in  
328 the serum; the VD levels were ascertained using five female mice before segregating  
329 them in the VD-C and VD-D groups. The other female mice (n=10/group) in each  
330 group were mated with 12-week-old C57BL/6J male mice by keeping two females per  
331 male in each cage. The mice were continuously fed throughout the gestation and

332 lactation period.

333 On the postnatal day 21, serum was prepared from the blood collected from male  
334 pups born to mice in the VD-C and VD-D groups (n=5/group) and the contents of 25  
335 hydroxyvitamin D<sub>3</sub> (25(OH)D<sub>3</sub>) was determined. The other male pups were  
336 respectively fed high-fat (HFD, No. H10060, 34.9% fat by weight, 60% kcal) (n=  
337 10/group, VD-C-HFD, VD-D-HFD) and normal fat (No. H10010, 4.3% fat by weight,  
338 10% kcal) (n=10/group, VD-C, VD-D) diets with normal vitamin D content for 16  
339 weeks, All the feeds were based on the formula of diet from Research Diets Inc. The  
340 schematic overview of the study design is shown in Supplementary Figure 1.

341 **Sample collection.** After feeding for 16 weeks, blood samples were collected by  
342 retro-orbital bleeding from the male offspring fasted for 12h, and the animal were  
343 subsequently anesthetized by cervical dislocation to relieve them of their suffering.  
344 Serum was separated by centrifuging the blood samples at 3000 rpm for 15 min after  
345 allowing them to stand at room temperature (20-25°C) for 30 min. Immediately, after  
346 the sacrifice of the animals, the epididymal white adipose tissue (eWAT), inguinal  
347 white adipose tissue (iWAT), hepatic tissue, and pancreas were removed and weighted.  
348 Portions of these tissues were put in 10% buffered formalin for histological analysis,  
349 Some portions of eWAT and iWAT were stored in PBS for the analysis of immune  
350 cells. The remaining tissues were frozen in liquid N<sub>2</sub> and transferred to a -80°C  
351 refrigerator until use. During the feeding process, the body weight was recorded  
352 weekly, and the food and energy intakes were measured monthly for the male  
353 offspring; the individual intake was calculated using the daily total intake for one cage  
354 divided by the number of mice in the cage.

355 To ensure the consistency of results, all the experiments were performed from  
356 08:00 to 12:00 h in accordance with the recommendations in the Guide for the Care  
357 and Use of Laboratory Animals of National Administration Regulations on Laboratory  
358 Animals of China. The animal protocol was approved by the Committee on the Ethics  
359 of Animal Experiments of First Affiliated Hospital of PLA General Hospital in China.

360        **Biochemical analyses.** The concentrations of calcium, triglycerides (TG) and  
361 total cholesterol (TC) in the serum were determined by colorimetric methods using  
362 the enzymatic assay kits (Maccura Biotechnology Co., Ltd, Sichuan, China).  
363 LC-MS/MS was used to measure the contents of 25(OH)D<sub>3</sub> in the serum; this  
364 analysis was performed at the Analytical Facility for Bioactive Molecules of the  
365 China Food and Drug Administration (Beijing, China).

366        **Oral glucose and insulin tolerance tests.** Oral glucose tolerance tests (OGTT)  
367 was performed in the 13th week of HFD feeding. After a 10-h overnight fasting and  
368 baseline sampling, mice were orally gavaged with 20% (weight/volume) glucose  
369 (2.0g /kg glucose solution) followed by collection of blood samples from the tail vein  
370 at 15, 30, 60, 90, and 120 min to determine the blood glucose levels using the  
371 Accu-Chek glucometer and glucose test paper (Johnson & Johnson, USA). Insulin  
372 tolerance tests (ITT) was performed 1 week after the OGTT. After 2-hour fasting,  
373 mice were weighted and blood samples were collected from the tail vein for serial  
374 blood glucose determinations. Biosynthetic human insulin (2IU/kg; Novo Nordisk  
375 A/S, Denmark) was injected through the intra-peritoneal route, and blood samples  
376 were collected from the tail vein at the baseline and after 15, 30, 60, 90, and 120 min  
377 of glucose challenge using Accu-Chek glucometer (Johnson & Johnson, USA).

378        **Histological analysis.** Three samples from the four groups (VD-C, VD-D,  
379 VD-C-HFD, and VD-D-HFD) were randomly selected for histological analysis.  
380 Specifically, the hepatic tissues were stained with Oil red O for histopathological  
381 assessment and examined under a light microscope at 400× magnification. The eWAT  
382 and iWAT were embedded in paraffin and 6 μm sections were cut and stained with  
383 hematoxylin and eosin (HE). The stained sections were visualized under a light  
384 microscope at 200× magnification. The Image-pro Plus software was used to  
385 quantitatively analyze the size of fat cells in the eWAT and iWAT and the amount of  
386 lipid droplets in the hepatic tissues. All these analyses were performed by Servicebio,  
387 Beijing, China.

388           **Immunohistochemical determination of insulin in the pancreas and F4/80 in**  
389 **adipose tissues.** The expression of insulin in the pancreas tissues obtained from  
390 VD-C, VD-D, VD-C-HFD and VD-D-HFD were assessed with rabbit anti-mouse  
391 insulin monoclonal antibody with slight modifications to account for segment-specific  
392 insulin distribution pattern. The F4/80 levels were determined  
393 immunohistochemically to estimate the quantity of the macrophages in the eWAT and  
394 iWAT. All these analyses were performed by Servicebio company in Beijing, China.

395           **Processing of fat pad for analysis of immune cells.** The eWAT and iWAT  
396 stored in PBS were transferred to the RPMI medium. Collagenase II (Sigma-Aldrich  
397 Inc., St Louis, MO, USA) was added to the medium at a final concentration of  
398 3mg/mL, and the suspension was incubated at 37°C for 45 min with constant shaking,  
399 and thereafter, filtered through a 200- $\mu$ m membrane. The filtrate was centrifuged at  
400 500 $\times$ g/min for 8 min to pellet the the stromal vascular cells (SVCs); the floating  
401 adipocytes were removed by decanting the supernatant. The SVCs were incubated  
402 with 500 $\mu$ L red blood cell lysis buffer for 5 min at room temperature (20-25°C). The  
403 SVCs were resuspended in PBS containing 0.5% BSA prior to the incubation in flow  
404 cytometry block solution (Rat anti-mouse CD16/CD32, eBioscience, San Diego, CA,  
405 USA) for 15 min on the ice. Thereafter, the SVCs were stained with specific  
406 antibodies (CD45, CD8, CD3, CD4, CD11c, eBioscience; CD64, BD Pharmingen,  
407 Franklin Lakes, NJ, USA) for 30 min at 4 C in the dark. The cells were then washed  
408 twice with PBS and analyzed with the FACSCanto II Flow Cytometer (BD  
409 Biosciences, USA) using the FlowJo flow cytometry software (Treestar Inc., Ashland,  
410 OR, USA).

411           **RT-PCR assessment of the expressions of inflammatory cytokine genes.** Total  
412 RNA in the eWAT and iWAT was extracted using the TRIzol Reagent (cat. no.  
413 15596-206, Invitrogen, Carlsbad, CA, USA), and cDNA was reverse transcribed by  
414 SuperScript<sup>TM</sup> III First-Strand Synthesis System for RT-PCR (cat. no. 18080-051,  
415 Invitrogen) following the manufacturer's instructions. The expression levels of genes

416 for pro-inflammatory cytokines, INOS, TNF- $\alpha$ , IFN- $\gamma$ , IL-6 and IL-1 $\beta$ , in M1  
417 macrophages and of those coding for anti-inflammatory cytokines, IL-4 and IL-10, in  
418 M2 macrophages were determined by RT-PCR (CFX-96, Bio-Rad, USA); the 36B4  
419 genes was used as the invariant internal control. The oligonucleotide primers for the  
420 targeted genes were designed using Primer-BLAST ([http://www.ncbi.nlm.nih.gov/  
421 tools/primer\\_blast/](http://www.ncbi.nlm.nih.gov/tools/primer_blast/)) and are listed in Supplementary Table 1. The assays were  
422 performed in triplicates, and the results were normalized with respect the internal  
423 standard mRNA levels using the  $2^{-\Delta\Delta CT}$  method.

424 **Determination of cytokine levels in the serum using Elisa kits.** The levels of  
425 inflammatory cytokines, TNF- $\alpha$ , IFN- $\gamma$ , IL-6, IL-4 and IL-10, in the serum were  
426 determined using Elisa kits, according to the manufacturer's guidelines (Invitrogen,  
427 ThermoFisher Scientific, CN).

428 **Statistical analysis.** All statistical analyses were conducted using SPSS 21.0.  
429 One-way analysis of variance (ANOVA) was performed to compare the means of  
430 indexes for different groups with normally distributed data, whereas the differences  
431 among data with non-normal distribution were assessed using Wilcoxon signed-rank  
432 test. The Student-Newman-Keuls (SNK) test was used to determine where the  
433 differences existed between two groups. A value of  $P < 0.05$  was considered to be  
434 statistically significant.

## 435 **Disclosure Statement**

436 The authors declared there were no conflict of interest.

## 437 **Acknowledgements**

438 This study was supported by National Natural Science Foundation of China  
439 (81602859). P.L., and P.L. participated the acquisition, analysis and interpretation of  
440 data. P.L., P.L., and L.L.Z. performed the mRNA extraction and gens expression.  
441 L.L.Z., and X.Y.C. carried out the animal feeding. Y.L.L., and W. J. L. assessed the



442 plasma biochemical parameters. P.L., R.X.Z., K.M.Q., and Y.Z. drafted and revised  
443 the manuscript, which all authors have commented on. All authors read and approved  
444 the final manuscript before submitting.

## 445 **References**

446 1. Wyatt SB, Winters KP, Dubbert PM. 2006. Overweight and obesity: prevalence,  
447 consequences, and causes of a growing public health problem. *The American journal*  
448 *of the medical sciences* 331: 166–74.

449 2. Guh D, Zhang W, Bansback N, Amarsi Z, Birmingham CL, Anis A. 2009. The  
450 incidence of comorbidities related to obesity and over weight: A systematic review  
451 and meta analysis. *BMC Public Health* 9: 88.

452 3. Poirier P, Giles TD, Bray GA, Hong Y, Stern JS, Pi-Sunyer FX, Eckel RH,  
453 American Heart Association, Obesity Committee of the Council on Nutrition,  
454 Physical Activity, and Metabolism. 2006. Obesity and cardiovascular disease:  
455 pathophysiology, evaluation, and effect of weight loss an update of the 1997  
456 American Heart Association Scientific statement on obesity and heart disease from  
457 the obesity committee of the council on nutrition, physical activity, and metabolism.  
458 *Circulation* 113: 898–918.

459 4. Eichelmann F, Schwingshackl L, Fedirko V, Aleksandrova K. 2016. Effect of  
460 plant-based diets on obesity-related inflammatory profiles: a systematic review and  
461 meta-analysis of intervention trials. *Obes Rev* 17: 1067-1079.

462 5. Suganami T, Nishida J, Ogawa Y. 2005. A paracrine loop between adipocytes and  
463 macrophages aggravates inflammatory changes role of free fatty acids and tumor  
464 necrosis factor  $\alpha$ . *Arterioscler Thromb Vasc Biol* 25: 2062–2068.

465 6. Park P, McMullen MR, Huang H, Thakur V, Nagy LE. 2007. Short-term treatment  
466 of RAW264.7 macrophages with adiponectin increases tumor necrosis factor- $\alpha$   
467 (TNF- $\alpha$ ) expression via ERK1/2 activation and egr-1 expression: role of TNF- $\alpha$  in  
468 adiponectin-stimulated interleukin-10 production. *J Biol Chem* 282: 21695-21703.

469 7. Mandal P, Pratt BT, Barnes M, McMullen MR, Nagy LE. 2011. Molecular  
470 mechanism for adiponectin-dependent M2 macrophage polarization link between the  
471 metabolic and innate immune activity of full-length adiponectin. *J Biol Chem* 286:  
472 13460-13469.

473 8. Freemerman AJ, Johnson AR, Sacks GN, Milner JJ, Kirk EL, Troester MA,  
474 Macintyre AN, Goraksha-Hicks P, Rathmell JC, and Makowski L. 2014. Metabolic  
475 reprogramming of macrophages: glucose transporter 1 (GLUT1)-mediated glucose  
476 metabolism drives a proinflammatory phenotype. *J Biol Chem* 289: 7884-96.

- 477 9. Escobedo N, Oliver G. 2017. The lymphatic vasculature: its role in adipose  
478 metabolism and obesity. *Cell Metab* 26: 598-609.
- 479 10. Li P, Lu M, Nguyen MT, Bae EJ, Chapman J, Feng D, Hawkins M, Pessin JE,  
480 Sears DD, Nguyen AK, Amidi A, Watkins SM, Nguyen U, Olefsky JM. 2010.  
481 Functional heterogeneity of CD11c-positive adipose tissue macrophages in  
482 diet-induced obese mice. *J Biol Chem* 285: 15333–15345.
- 483 11. Appari M, Channon KM, McNeill E. 2018. Metabolic Regulation of Adipose  
484 Tissue Macrophage Function in Obesity and Diabetes. *Antioxid Redox Signal* 29:  
485 297-312.
- 486 12. Thomas D, Apovian C. 2017. Macrophage functions in lean and obese adipose  
487 tissue. *Metabolism* 72: 120-143.
- 488 13. Wagner M, Samdal Steinskog ES, Wiig H. 2015. Adipose tissue macrophages: the  
489 inflammatory link between obesity and cancer? *Expert Opin Ther Targets* 19: 527-38.
- 490 14. Matsumoto A, Taniguchi K, Takeda N, Yamamura KI, Arai S, Miyazaki T. 2017.  
491 Inflammatory and anti-inflammatory states of adipose tissue in transgenic mice  
492 bearing a single TCR. *Int Immunol* 29: 21-30.
- 493 15. Goldner WS, Stoner JA, Thompson J, Taylor K, Larson L, Erickson J, McBride C.  
494 2008. Prevalence of vitamin D insufficiency and deficiency in morbidly obese patients:  
495 A comparison with non-obese controls. *Obes Surg* 18: 145-150.
- 496 16. Gonzalez-Molero I, Rojo-Martínez G, Morcillo S, Gutierrez C, Rubio E,  
497 Pérez-Valero V, Esteva I, Ruiz de Adana MS, Almaraz MC, Colomo N, Olveira G,  
498 Soriguer F. 2008. Hypovitaminosis D and incidence of obesity: A prospective study.  
499 *Obes Surg* 18: 145-50.
- 500 17. Christakos S. 2012. Mechanism of action of 1,25-dihydroxyvitamin D3 on  
501 intestinal calcium absorption. *Rev Endocr Metab Disord* 13: 39-44.
- 502 18. Kumar R, Thompson JR. 2011. The regulation of parathyroid hormone secretion  
503 and synthesis. *J Am Soc Nephrol* 22: 216-24.
- 504 19. Lederer E. 2014. Regulation of serum phosphate. *J Physiol* 592: 3985-95.
- 505 20. Eisman JA, Bouillon R. 2014. Vitamin D: direct effects of vitamin D metabolites  
506 on bone: lessons from genetically modified mice. *Bonekey Rep* 3: 499.
- 507 21. Eve Hornsby, Paul E, Pfeffer MR. 2018. Vitamin D supplementation during  
508 pregnancy: Effect on the neonatal immune system in a randomized controlled trial. *J*  
509 *Allergy Clin Immunol* 141: 269-278.
- 510 22. Sun X, Zemel MB. 2008. Calcitriol and calcium regulate cytokine production and  
511 adipocyte-macrophage cross-talk. *J Nutr Biochem* 19: 392–399.

- 512 23. Chang E, Kim Y. 2017. Vitamin D Insufficiency Exacerbates Adipose Tissue  
513 Macrophage Infiltration and Decreases AMPK/SIRT1 Activity in Obese Rats.  
514 *Nutrients* 9: pii: E338.
- 515 24. Muhlhausler B, Smith SR. 2009. Early-life origins of metabolic dysfunction: role  
516 of the adipocyte. *Trends Endocrinol Metab* 20: 51-7.
- 517 25. Muhlhausler BS1, Gugusheff JR, Ong ZY, Vithayathil MA. 2013. Nutritional  
518 approaches to breaking the intergenerational cycle of obesity. *Can J Physiol*  
519 *Pharmacol* 91: 421-8.
- 520 26. Theresa OS, Xinhua C. 2009. Vitamin D intake during pregnancy: association  
521 with maternal characteristics and infant birth weight. *Early Hum Dev* 85: 231-4.
- 522 27. Palacios C, Gonzalez L. 2014. Is vitamin D deficiency a major global public  
523 health problem? *J Steroid Biochem Mol Biol* 144: 138-45.
- 524 28. Ong YL, Quah PL, Tint MT, Aris IM, Chen LW, van Dam RM, Heppe D, Saw SM,  
525 Godfrey KM, Gluckman PD, Chong YS, Yap F, Lee YS, Foong-Fong Chong M. 2016.  
526 The association of maternal vitamin D status with infant birth outcomes, postnatal  
527 growth and adiposity in the first 2 years of life in a multi-ethnic Asian population: the  
528 Growing Up in Singapore Towards healthy Outcomes (GUSTO) cohort study. *Br J*  
529 *Nutr* 116: 621-31.
- 530 29. Pasco JA, Wark JD, Carlin JB, Ponsonby AL, Vuillermin PJ, Morley R. 2008.  
531 Maternal vitamin D in pregnancy may influence not only offspring bone mass but  
532 other aspects of musculoskeletal health and adiposity. *Med Hypotheses* 71: 266-9.
- 533 30. Belenchia AM, Jones KL, Will M, Beversdorf DQ, Vieira-Potter V, Rosenfeld CS,  
534 Peterson CA. 2018. Maternal vitamin D deficiency during pregnancy affects  
535 expression of adipogenic-regulating genes peroxisome proliferator-activated receptor  
536 gamma (PPAR  $\gamma$ ) and vitamin D receptor (VDR) in lean male mice offspring. *Eur J*  
537 *Nutr* 57: 723-730.
- 538 31. Villa CR, Chen J, Wen B, Sacco SM, Taibi A, Ward WE, Comelli EM. 2016.  
539 Maternal Dietary Vitamin D Does Not Program Systemic Inflammation and Bone  
540 Health in Adult Female Mice Fed an Obesogenic Diet. *Nutrients* 8: pii: E675.
- 541 32. Sofi F, Dinu M, Pagliai G, Cesari F, Gori AM, Sereni A, Becatti M, Fiorillo C,  
542 Marcucci R, Casini A. 2018. Low-Calorie Vegetarian Versus Mediterranean Diets for  
543 Reducing Body Weight and Improving Cardiovascular Risk Profile: CARDIVEG  
544 Study (Cardiovascular Prevention With Vegetarian Diet). *Circulation* 137: 1103-1113.
- 545 33. Walker GE, Follenzi A, Brusca V, Manfredi M, Bellone S, Marengo E, Maiuri  
546 L, Prodam F, Bona G. 2018. Fetuin B links vitamin D deficiency and pediatric obesity:  
547 Direct negative regulation by vitamin D. *J Steroid Biochem Mol Biol* 182: 37-49.
- 548 34. Belenchia AM, Johnson SA, Eilersieck MR, Rosenfeld CS, Peterson CA. 2017. In

- 549 utero vitamin D deficiency predisposes offspring to long-term adverse adipose tissue  
550 effects. *J Endocrinol* 234: 301-313.
- 551 35. Narvaez CJ, Simmons KM, Brunton J, Salinero A, Chittur SV, Welsh JE. 2013.  
552 Induction of STEAP4 correlates with 1,25-dihydroxyvitamin D3 stimulation of  
553 adipogenesis in mesenchymal progenitor cells derived from human adipose tissue. *J*  
554 *Cell Physiol* 228: 2024-36.
- 555 36. Batatinha HAP, Rosa Neto JC, Krüger K. 2019. Inflammatory features of obesity  
556 and smoke exposure and the immunologic effects of exercise. *Exerc Immunol Rev* 25:  
557 96-111.
- 558 37. Maiorino MI, Bellastella G, Giugliano D, Esposito K. 2018. From inflammation  
559 to sexual dysfunctions: a journey through diabetes, obesity, and metabolic syndrome. *J*  
560 *Endocrinol Invest* 41: 1249-1258.
- 561 38. Villarroya F, Cereijo R, Gavaldà-Navarro A, Villarroya J, Giralt M. 2018.  
562 Inflammation of brown/beige adipose tissues in obesity and metabolic disease. *J*  
563 *Intern Med* 284: 492-504.
- 564 39. Elimrani I, Koenekoop J, Dionne S, Marcil V, Delvin E, Levy E, Seidman EG.  
565 2017. Vitamin D Reduces Colitis- and Inflammation-Associated Colorectal Cancer in  
566 Mice Independent of NOD2. *Nutr Cancer* 69: 276-288.
- 567 40. Martinez-Santibañez G, Lumeng CN. 2014. Macrophages and the regulation of  
568 adipose tissue remodeling. *Annu Rev Nutr* 34: 57-76.
- 569 41. Rausch ME, Weisberg S, Vardhana P, Tortoriello DV. 2008. Obesity in C57BL/6J  
570 mice is characterized by adipose tissue hypoxia and cytotoxic T-cell infiltration. *Int J*  
571 *Obes* 32: 451-63.
- 572 42. Nishimura S, Manabe I, Nagasaki M, Eto K, Yamashita H, Ohsugi M, Hara K,  
573 Ueki K, Sugiura S, Yoshimura K, Kadowaki T, Nagai R. 2009. CD8+ effector T cells  
574 contribute to macrophage recruitment and adipose tissue inflammation in obesity. *Nat*  
575 *Med* 15: 914-20.
- 576 43. Luck H, Tsai S, Chung J, Clemente-Casares X, Ghazarian M, Revelo XS, Lei H,  
577 Luk CT, Shi SY, Surendra A, Copeland JK, Ahn J, Prescott D, Rasmussen BA, Chng  
578 MH, Engleman EG, Girardin SE, Lam TK, Croitoru K, Dunn S, Philpott DJ, Guttman  
579 DS, Woo M, Winer S, Winer DA. 2015. Regulation of obesity-related insulin  
580 resistance with gut anti-inflammatory agents. *Cell Metab* 21: 527-42.
- 581 44. Zlotnikov-Klionsky Y, Nathansohn-Levi B, Shezen E, Rosen C, Kagan S, Bar-On  
582 L, Jung S, Shifrut E, Reich-Zeliger S, Friedman N, Aharoni R, Arnon R, Yifa O,  
583 Aronovich A, Reisner Y. 2015. Perforin-Positive Dendritic Cells Exhibit an  
584 Immuno-regulatory Role in Metabolic Syndrome and Autoimmunity. *Immunity* 43:  
585 776-87.

## 586 **Figure legends**

587 **Figure 1 Body weight, glucose, and lipid metabolism-related indicators in**  
588 **response to different maternal vitamin D intake in the non-obese and obese male**  
589 **offspring.** The body weights in the maternal vitamin D-deficient groups were found  
590 to be significantly increased compared to that in the control group both in the  
591 non-obese (VD-D vs. VD-D) and obese male offspring (VD-D-HFD vs. VD-C-HFD)  
592 (A), and were accompanied with larger adipose cells in the eWAT (C and D) and  
593 iWAT (E and F), decreased insulin secretion (H, J, and K), and higher glucose levels  
594 in the serum (G and I), with no differences in the energy intake (B). n = 10  
595 mice/group. VD-C: maternal normal diet and normal diet after weaning, VD-D:  
596 maternal VD deficient diet and normal diet after weaning, VD-C-HFD: maternal  
597 normal diet and high-fat diet after weaning, VD-D-HFD: maternal VD-deficient diet  
598 and high-fat diet after weaning, eWAT: epididymal white adipose tissue, iWAT:  
599 inguinal white adipose tissue. n = 10 in each group. \*  $P < 0.05$ , compared to the VD-C.  
600 #  $P < 0.05$ , compared to the VD-D. &  $P < 0.05$ , compared to the VD-C-HFD.

601 **Figure 2 Infiltration and percentage of immune cells in the eWAT and iWAT in**  
602 **response to different maternal vitamin D intake in the non-obese and obese male**  
603 **offspring.** The infiltration and percentage of immune cells was affected by the  
604 different maternal vitamin D intake both in the non-obese and obese male offspring in  
605 the eWAT (A and C) and iWAT (B and D). VD-C: maternal normal diet and normal  
606 diet after weaning, VD-D: maternal VD-deficient diet and normal diet after weaning,  
607 VD-C-HFD: maternal normal diet and high-fat diet after weaning, VD-D-HFD:  
608 maternal VD-deficient diet and high-fat diet after weaning.

609 **Figure 3 Population of ATM, ADTC, and T cells in the eWAT in response to**  
610 **different maternal vitamin D intake in the non-obese and obese male offspring.**  
611 Maternal VD-deficient intake increased the population of CD11C<sup>+</sup>ATMs (A, B, and  
612 C), ATDCs (A, B, and C), CD4<sup>+</sup>T cells (E, F, and G), CD8<sup>+</sup>T cells (E, F, and G), the  
613 percentage of CD11C<sup>+</sup> ATMs (D), and decreased the proportion of CD11C<sup>-</sup> ATMs (A,

614 B, and C) and the percentage of CD11C<sup>-</sup> ATMs (D), with no differences in the ratio of  
615 CD4<sup>+</sup>/CD8<sup>+</sup> T cells (H) both in the non-obese (VD-D vs. VD-D) and/or obese  
616 (VD-D-HFD vs. VD-C-HFD) male offspring. VD-C: maternal normal diet and normal  
617 diet after weaning, VD-D: maternal VD deficient diet and normal diet after weaning,  
618 VD-C-HFD: maternal normal diet and high-fat diet after weaning, VD-D-HFD:  
619 maternal VD-deficient diet and high-fat diet after weaning, eWAT: epididymal white  
620 adipose tissue. \*  $P < 0.05$ , compared to the VD-C. #  $P < 0.05$ , compared to the VD-D. &  
621  $P < 0.05$ , compared to the VD-C-HFD.

622 **Figure 4 Population of ATM, ADTC, and T cells in the iWAT in response to**  
623 **different maternal vitamin D intake in the non-obese and obese male offspring.**

624 Maternal VD-deficient intake increased the population of CD11C<sup>+</sup> ATMs (A, B, and  
625 C), CD11C<sup>-</sup> ATMs (A, B, and C), ATDCs (A, B, and C), CD4<sup>+</sup> T cells (E, F, and G),  
626 CD8<sup>+</sup> T cells (E, F, and G), the percentage of CD11C<sup>+</sup> ATMs (D) and CD4<sup>+</sup> T (H) in  
627 the non-obese groups (VD-D vs. VD-D). In the obese groups, the population of  
628 ATDCs (A, B, and C) and the percentage of CD4<sup>+</sup> T cells (H) were higher in  
629 VD-D-HFD than in the VD-C-HFD group. VD-C: maternal normal diet and normal  
630 diet after weaning, VD-D: maternal VD-deficient diet and normal diet after weaning,  
631 VD-C-HFD: maternal normal diet and high-fat diet after weaning, VD-D-HFD:  
632 maternal VD-deficient diet and high-fat diet after weaning, iWAT: inguinal white  
633 adipose tissue. \*  $P < 0.05$ , compared to the VD-C. #  $P < 0.05$ , compared to the VD-D. &  
634  $P < 0.05$ , compared to the VD-C-HFD,  $P < 0.05$ .

635 **Figure 5 Expression levels of proinflammatory and inflammasome cytokine**

636 **genes in the eWAT and iWAT.** Maternal VD-deficient intake increased the  
637 expression levels of inflammasome cytokine genes, namely INOS, IL-1 $\beta$ , TNF $\alpha$ ,  
638 INF $\gamma$ , and IL-6 in the eWAT both in the non-obese (VD-D vs. VD-D) and obese male  
639 offspring (VD-D-HFD vs. VD-C-HFD) (A), whereas the expression levels of genes  
640 encoding the proinflammatory cytokines, including Arg-1, IL-4, and IL-10, were  
641 higher in the VD-D group than in the VD-C group, and were lower in VD-D-HFD

642 group than in the VD-HFD group in the eWAT (B). In the iWAT, maternal  
643 VD-deficient intake increased the levels of genes encoding the cytokines, INOS,  
644 IL-1 $\beta$ , TNF $\alpha$ , INF $\gamma$ , IL-6, IL-4, and IL-10, in the non-obese (VD-D vs. VD-C) male  
645 offspring (C, D), whereas in the obese group, the expression levels of the INF $\gamma$  gene  
646 were higher and those of the Arg-1 gene were lower in the VD-D-HFD group than in  
647 the VD-C-HFD group. VD-C: maternal normal diet and normal diet after weaning,  
648 VD-D: maternal VD-deficient diet and normal diet after weaning, VD-C-HFD:  
649 maternal normal diet and high-fat diet after weaning, VD-D-HFD: maternal  
650 VD-deficient diet and high fat diet after weaning, eWAT: epididymal white adipose  
651 tissue; iWAT: inguinal white adipose tissue. \* $P < 0.05$ , compared to the VD-C. #  
652  $P < 0.05$ , compared to the VD-D. &  $P < 0.05$ , compared to the VD-C-HFD.

653 **Figure 6 Levels of cytokines in the serum in response to different maternal**  
654 **vitamin D intake in the non-obese and obese male offspring.** The levels of  
655 inflammasome cytokines, namely INF $\gamma$  (A) and TNF $\alpha$  (B) in the maternal vitamin  
656 D-deficient groups were found to be significantly increased, whereas the contents of  
657 proinflammatory cytokines, IL-4 (D) and IL-10 (E), were decreased compared to that  
658 in the control group both in the non-obese (VD-D vs. VD-D) and/or obese male  
659 offspring (VD-D-HFD vs. VD-C-HFD). VD-C: maternal normal diet and normal diet  
660 after weaning, VD-D: maternal VD-deficient diet and normal diet after weaning,  
661 VD-C-HFD: maternal normal diet and high-fat diet after weaning, VD-D-HFD:  
662 maternal VD-deficient diet and high-fat diet after weaning, eWAT: epididymal white  
663 adipose tissue; iWAT: inguinal white adipose tissue. \*  $P < 0.05$ , compared to the VD-C.  
664 #  $P < 0.05$ , compared to the VD-D. &  $P < 0.05$ , compared to the VD-C-HFD.

**Table 1 Effects of maternal vitamin D status on the metabolic characteristics among the male offspring**

| Indicators                            | VD-C (n=10)  | VD-D (n=10) | VD-C-HFD (n=10)          | VD-D-HFD (n=10)               | <i>P</i> |
|---------------------------------------|--------------|-------------|--------------------------|-------------------------------|----------|
| Final body weight (g)                 | 30.29±1.37   | 33.75±1.21* | 42.05±1.63* <sup>#</sup> | 46.40±1.28* <sup>#&amp;</sup> | 0.018    |
| Average food intake (g/day/mice)      | 2.58±0.17    | 2.65±0.29   | 2.41±0.23                | 2.29±0.24                     | 0.211    |
| Average energy intake (kcal/day/mice) | 9.86±0.28    | 10.13±0.69  | 12.59±0.46* <sup>#</sup> | 12.01±0.75* <sup>#</sup>      | <0.001   |
| eWAT weight (g)                       | 0.74±0.11    | 1.02±0.12*  | 1.94±0.096* <sup>#</sup> | 2.43±0.092* <sup>#&amp;</sup> | <0.001   |
| iWAT weight (g)                       | 0.51±0.087   | 0.75±0.096* | 1.82±0.17* <sup>#</sup>  | 2.09±0.12* <sup>#&amp;</sup>  | <0.001   |
| eWAT /body weight (%)                 | 2.61±0.26    | 3.29±0.32*  | 4.69±0.27* <sup>#</sup>  | 5.38±0.21* <sup>#&amp;</sup>  | <0.001   |
| iWAT /body weight (%)                 | 1.81±0.24    | 2.39±0.26*  | 4.29±0.38* <sup>#</sup>  | 4.64±0.24* <sup>#</sup>       | <0.001   |
| 25 hydroxyvitamin D3 (ug/L)           | 122.67±13.59 | 108.39±6.43 | 64.91±7.89* <sup>#</sup> | 49.31±5.43* <sup>#</sup>      | <0.001   |
| Calcium (mmol/L)                      | 2.45±0.23    | 2.58±0.13   | 2.60±0.30                | 2.71±0.17                     | 0.084    |
| Random blood glucose (mmol/L)         | 6.17±1.59    | 6.17±0.96   | 8.42±1.08* <sup>#</sup>  | 9.09±1.18* <sup>#</sup>       | <0.001   |
| TC (mmol/L)                           | 3.45±0.13    | 3.95±0.13   | 4.71±0.19* <sup>#</sup>  | 6.12±0.23* <sup>#&amp;</sup>  | <0.001   |
| TG (mmol/L)                           | 0.87±0.18    | 1.04±0.17*  | 1.47±0.12* <sup>#</sup>  | 1.72±0.18* <sup>#&amp;</sup>  | 0.007    |



Note: VD-C: maternal normal diet and normal diet after weaning, VD-D: maternal VD deficient diet and normal diet after weaning, VD-C-HFD: maternal normal diet and high fat diet after weaning, VD-D-HFD: maternal VD deficient diet and high fat diet after weaning, eWAT: epididymal white adipose tissue, iWAT: inguinal white adipose tissue, TG: triglyceride, TC: total cholesterol. Values were means  $\pm$  SD, n=10 in each group. The ANOVA was performed to compare the means of indexes among different groups. Then the SNK test was used to determine where the differences existed between each two groups. \*Compared to the VD-C group,  $P < 0.05$ . #Compared to the VD-D group,  $P < 0.05$ . &Compared to the VD-C-HFD group,  $P < 0.05$ .

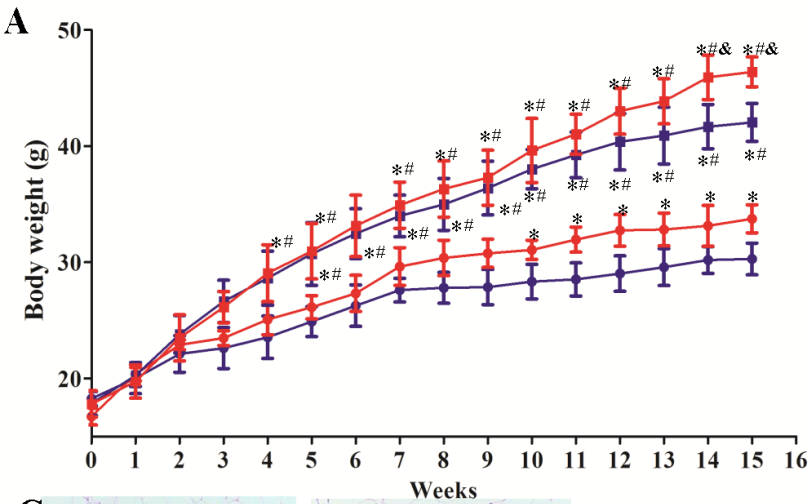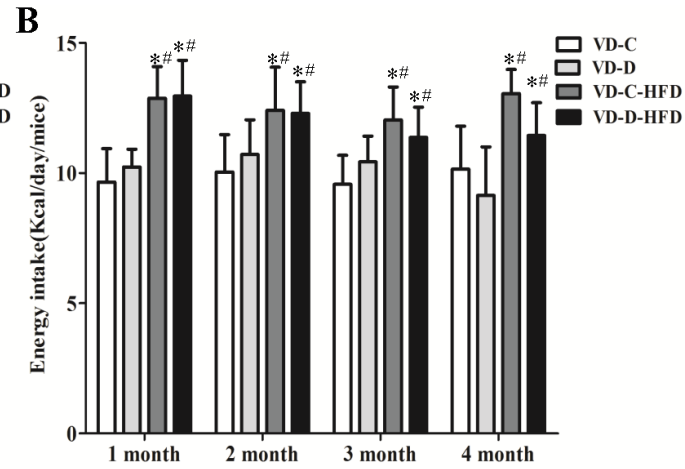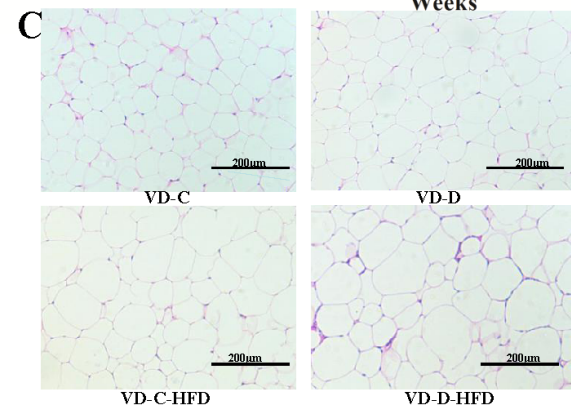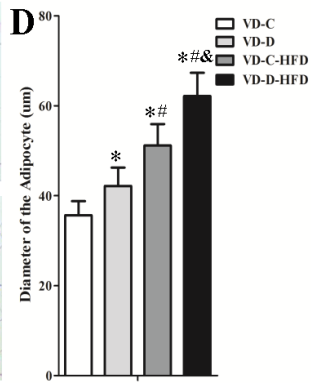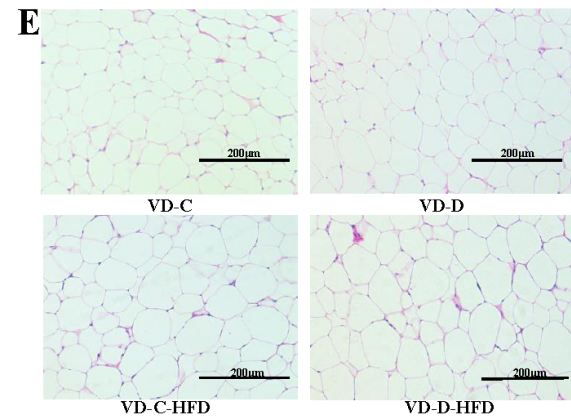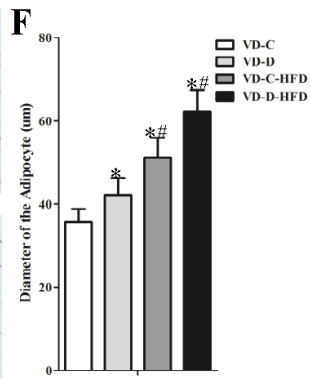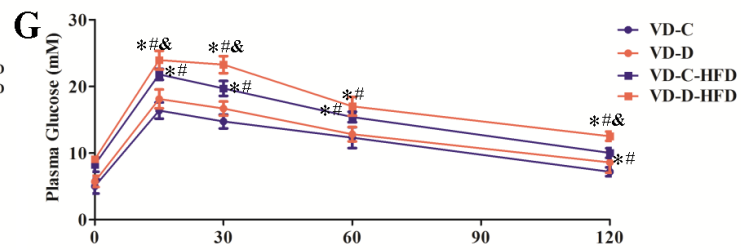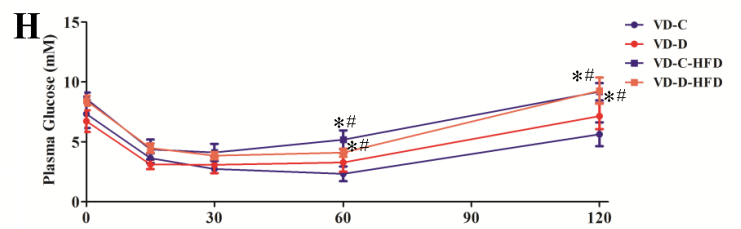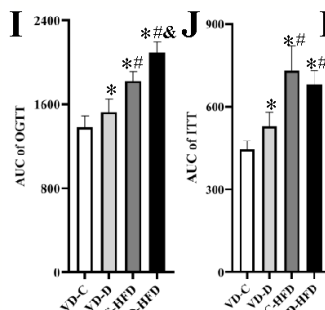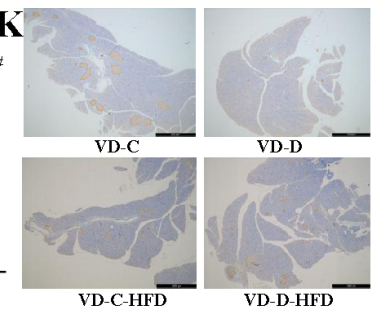

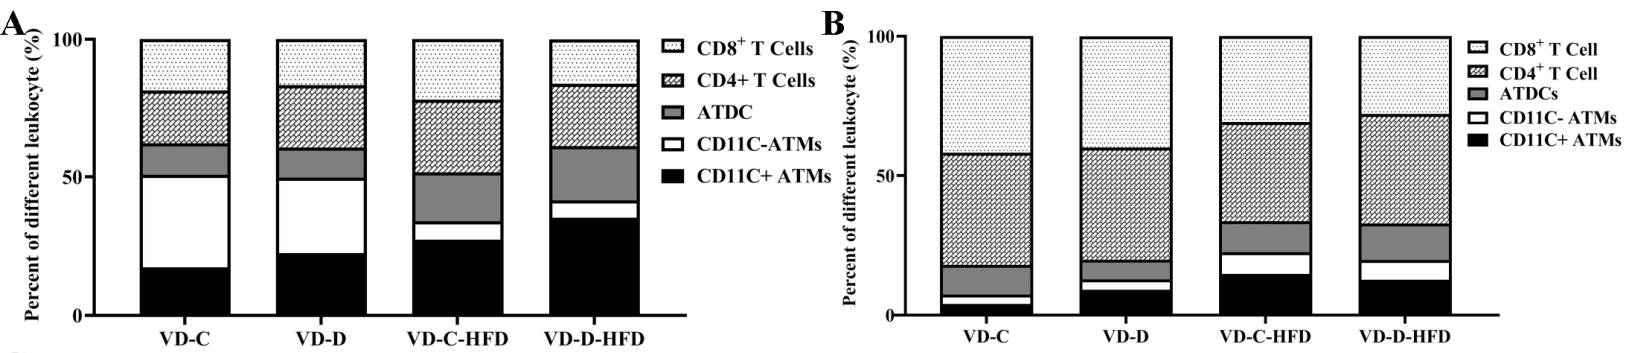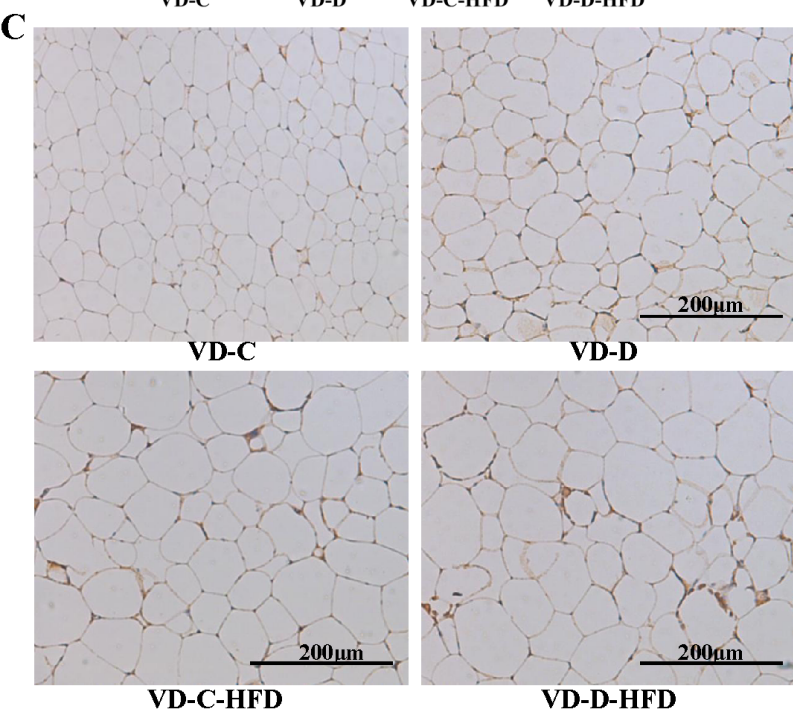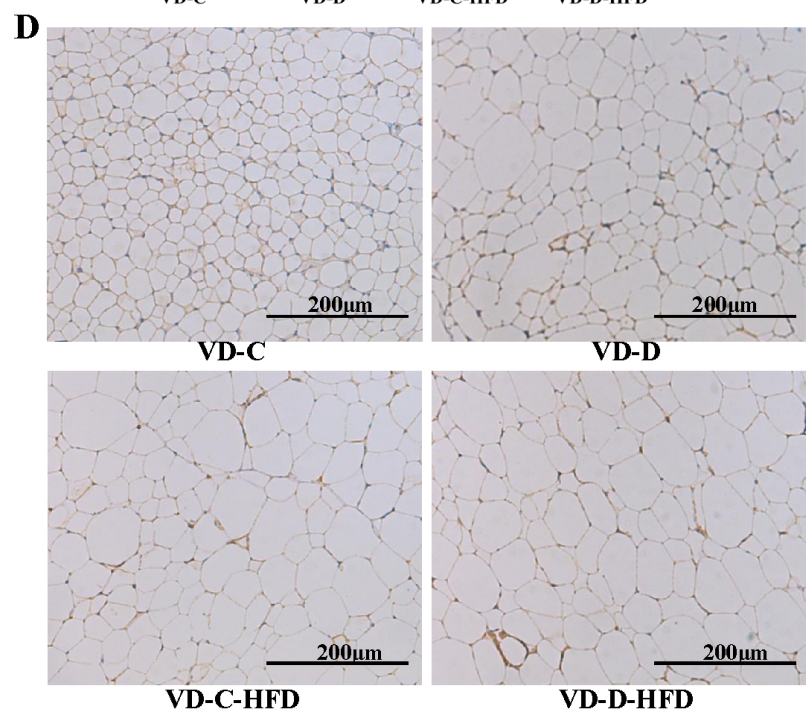

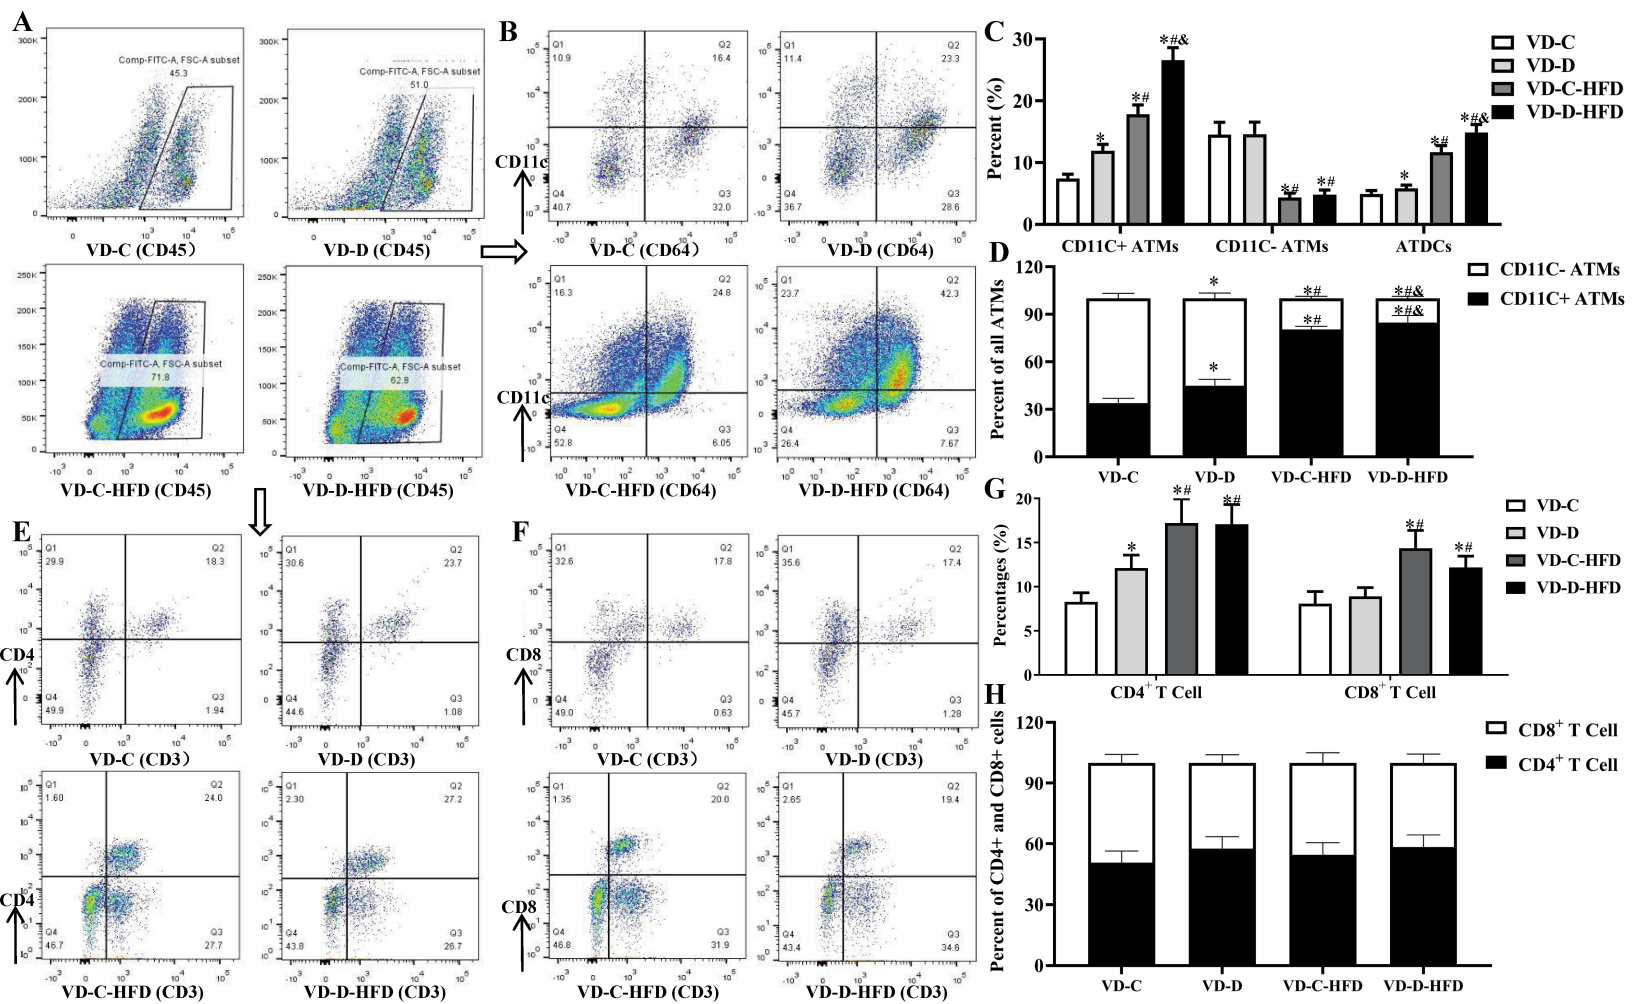

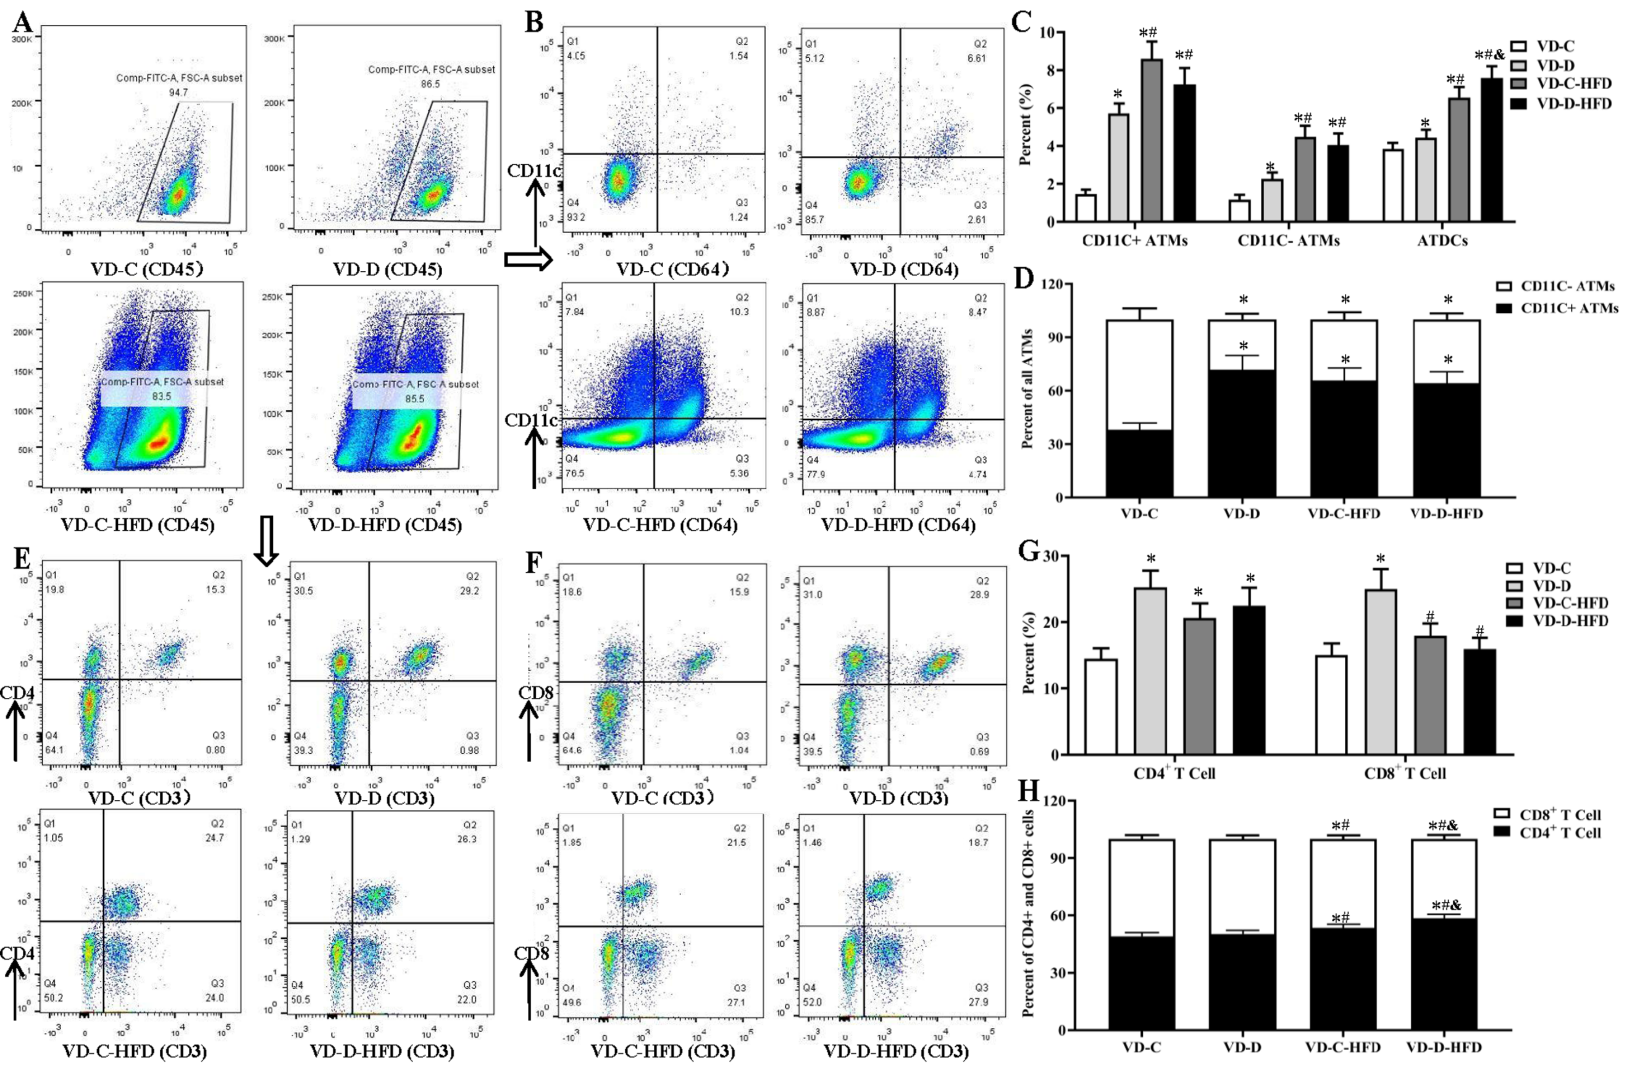

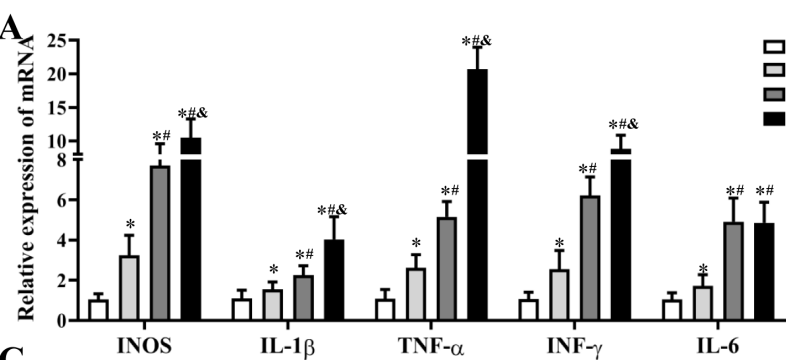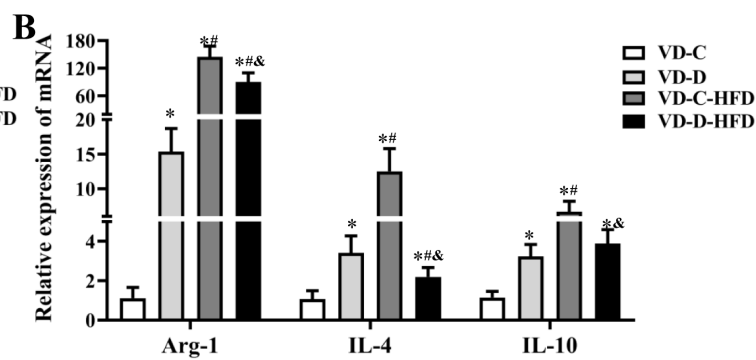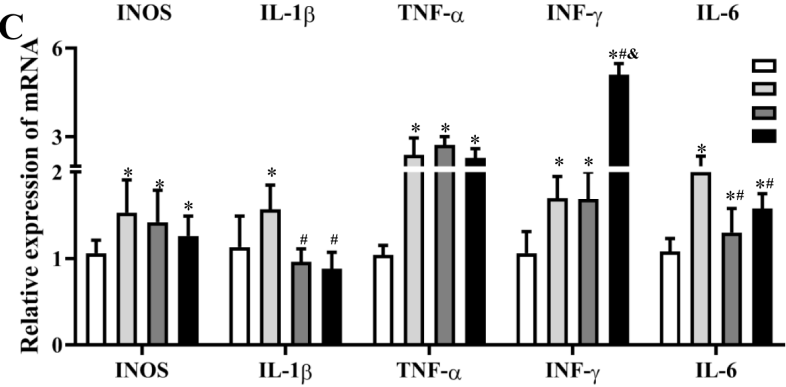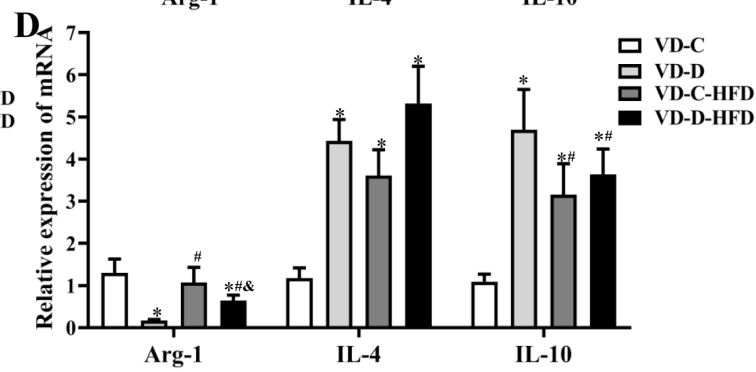

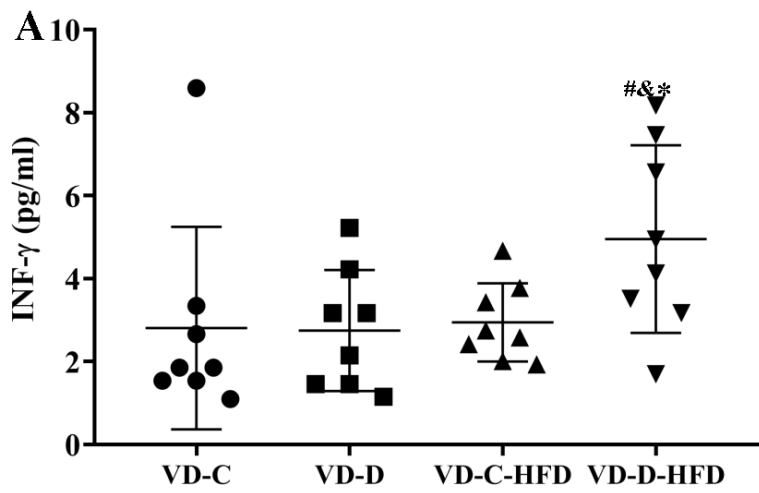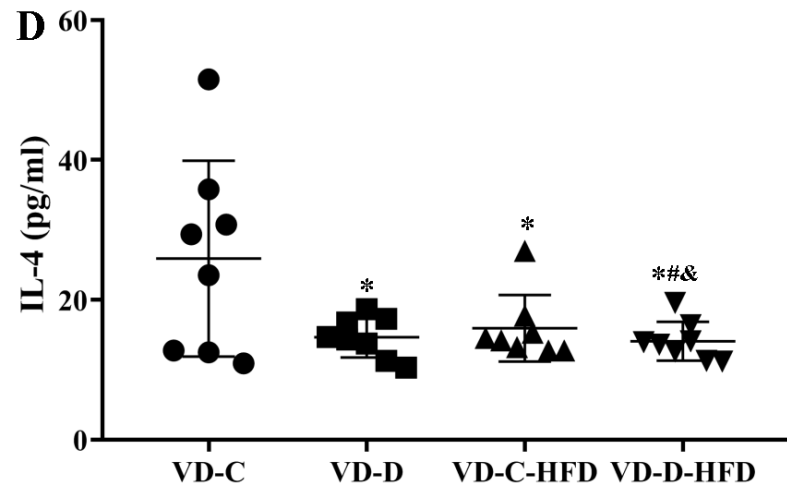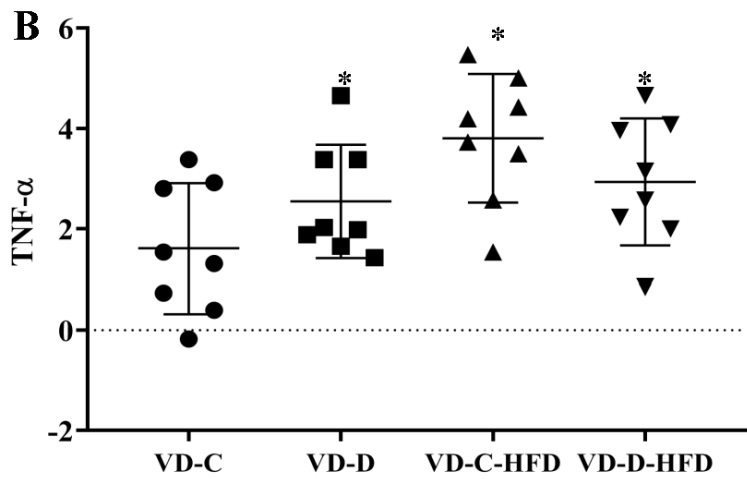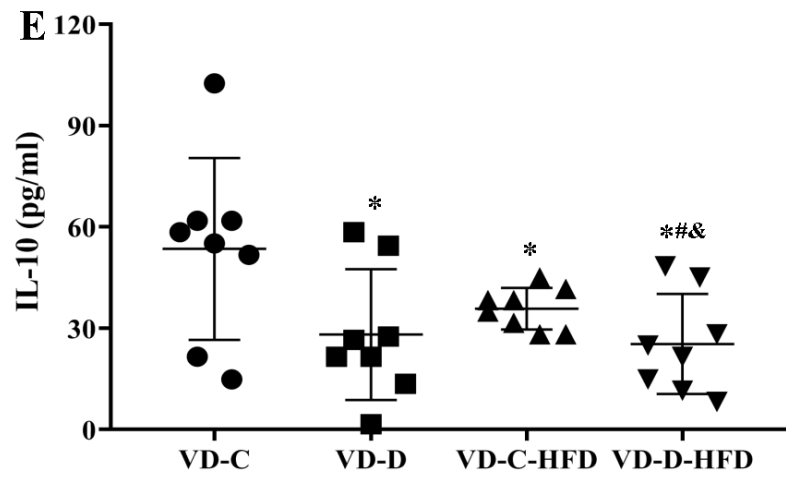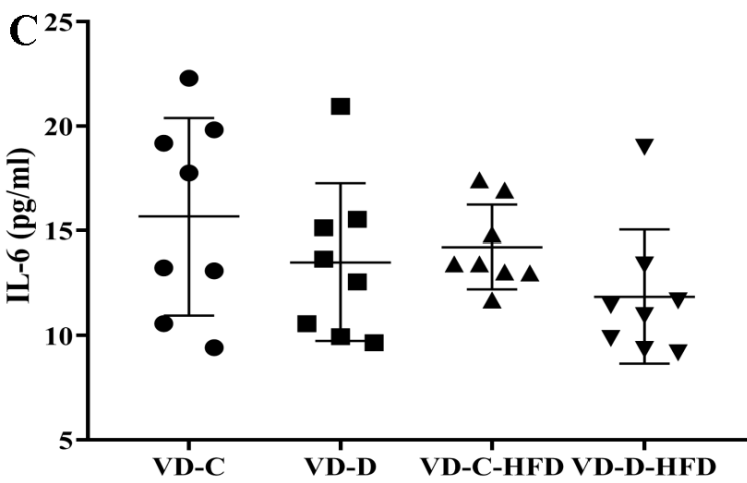

Source: https://www.biorxiv.org/content/10.1101/2020.03.23.004721v1.full.pdf
